# Supplementary material
Source: publisher figshare collection journal article supplement (https://tandf.figshare.com/articles/dataset/_/6534170)
Supplement: Supplementary file 1 [file 1]

Archive with 3 entries (3 files):
- JASA_ACS_author_form.pdf
- OnlineAppendix_plr5-1.pdf
- codesPLR.zip
